# Supplementary material for: Circulating microRNA-135a-3p in serum extracellular vesicles as a potential biological marker of non-alcoholic fatty liver disease
Source: PubMed Central journal article supplement — Mol Med Rep. 2021 May 6;24(1):498. doi: 10.3892/mmr.2021.12137 (PMC8127071; doi:10.3892/mmr.2021.12137), 2021-05-06
Supplement: Supplementary_Data.pdf [file Supplementary_Data.pdf]

Figure S1. Expression levels of miRNA in hepatocytes from mice fed HFD or CD. Expression levels of (A) miR-122-5p, (B) miR-129-5p, (C) miR-135a-3p and (D) miR-504-3p were assessed in hepatocytes isolated from mice fed HFD or CD using reverse transcription-quantitative PCR (n=5/group). Data are presented as the mean  $\pm$  SD. \*P<0.05, \*\*P<0.01. miR, microRNA; HFD, high-fat diet; CD, chow diet; NS, not significant.

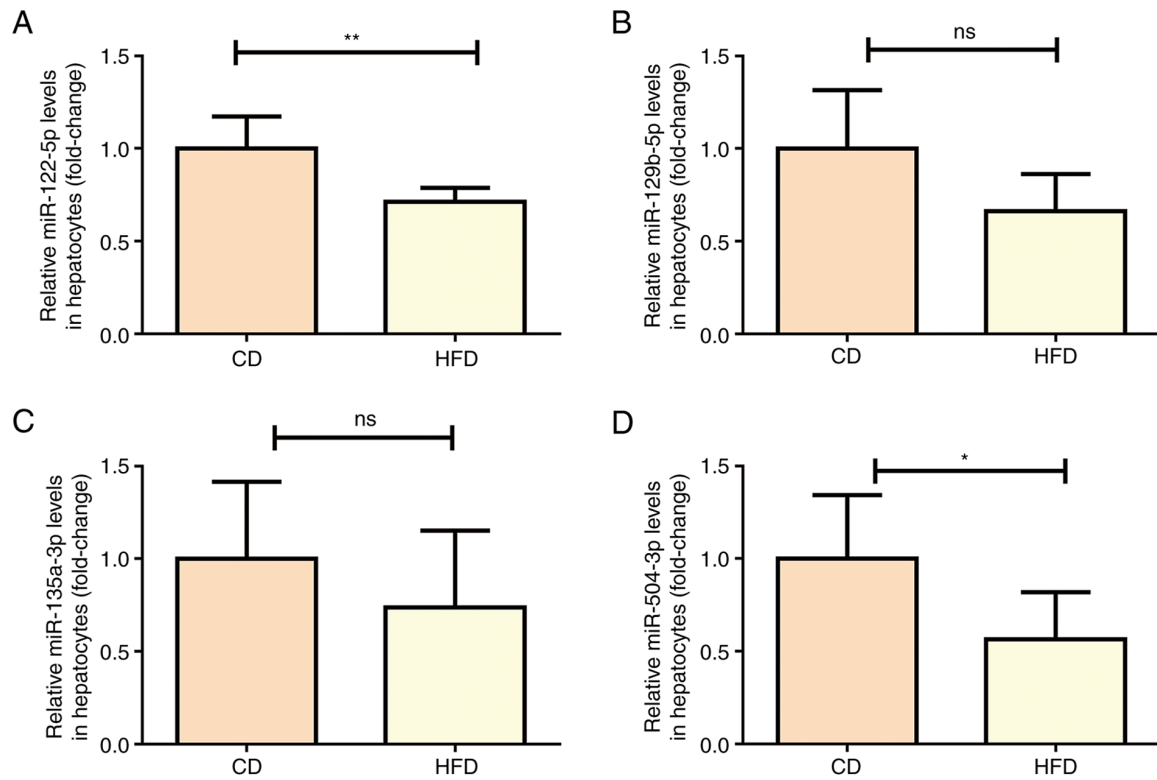

Figure S2. Expression levels of screened miRs in serum from patients with NAFLD and healthy controls. Serum expression levels of (A) miR-122-5p, (B) miR-129-5p, (C) miR-135a-3p and (D) miR-504-3p were assessed in patients with NAFLD (n=10) and healthy controls (n=10) using reverse transcription-quantitative PCR. Data are presented as the mean  $\pm$  SD. \*P<0.05, \*\*\*P<0.001. miR, microRNA; NAFLD, non-alcoholic fatty liver disease; NS, not significant.

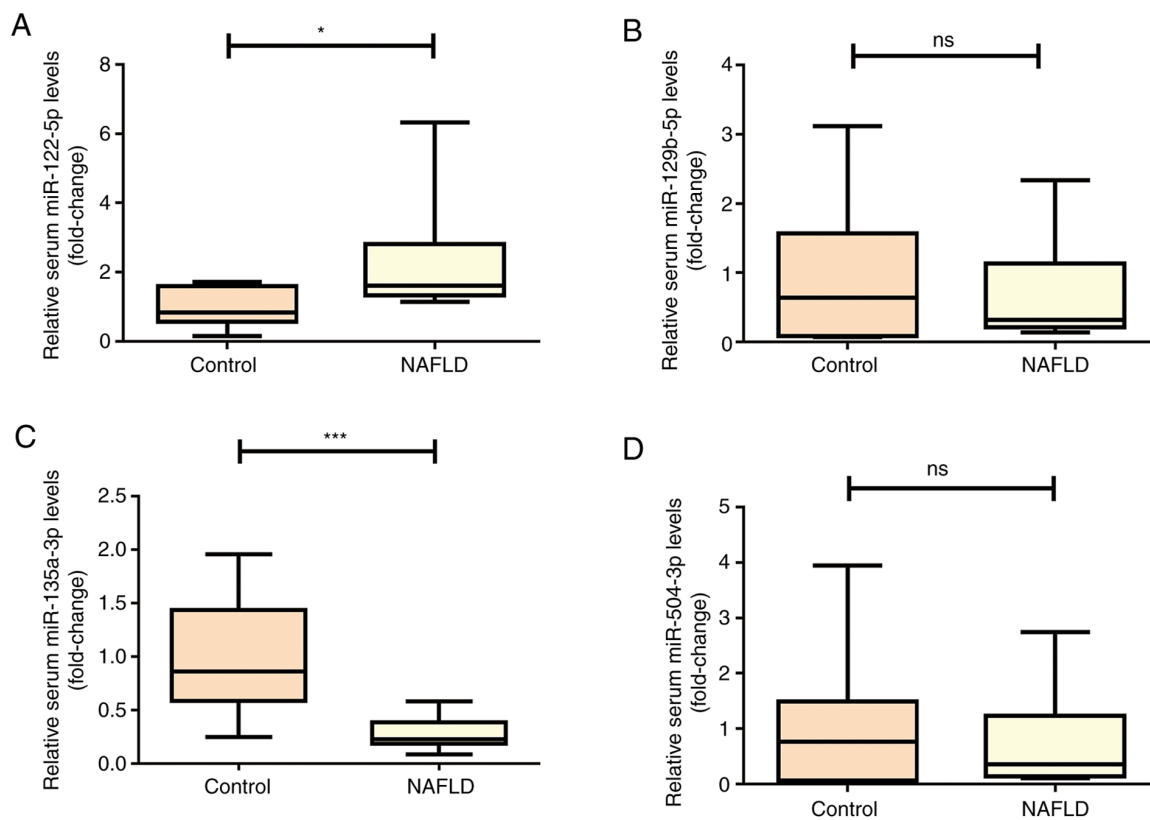

Table SI. NAS of HFD mice and controls.

| Parameter              | CD (n=5)  | HFD (n=5) |
|------------------------|-----------|-----------|
| Steatosis              | 0.00±0.00 | 2.80±0.45 |
| Hepatocyte hypertrophy | 0.00±0.00 | 0.20±0.44 |
| Inflammation           | 0.20±0.44 | 1.00±0.00 |
| Fibrosis               | 0.00±0.00 | 0.20±0.44 |
| NAS                    | 0.20±0.44 | 4.20±0.84 |

NAS grading steatosis, ballooning (hepatocyte hypertrophy), inflammation and fibrosis. Data are presented as the mean ± SD. NAS, non-alcoholic steatohepatitis activity score; HFD, high-fat diet; CD, chow diet.
